# Supplementary material
Source: PubMed Central journal article supplement (PMC10512893)

## Appendix A

The following SAS code is an example for fitting the Global Odds model with 3 levels for each outcome, Y and Z. The words in bold should be replaced to represent the data of interest.

```
*****  
* Sample SAS code to run the Global Odds model *  
*****;
```

```
proc nlmixed data = DataNam tech = trureg optcheck cov;
```

\*If you have a 3 level in each outcome, you will have 4 intercepts. Use initial values obtained by fitting separate logistic regressions. The term “YTrend InitialValue” and “ZTrend InitialValue” is included when the trend odds holds respectively for Y and Z.;

```
parms
```

```
  YIntercept1 InitialValue YIntercept2 InitialValue
```

```
  ZIntercept1 InitialValue ZIntercept2 InitialValue GlobalOddsIntercept InitialValue
```

```
  YBeta InitialValue ZBeta InitialValue YZBeta InitialValue
```

```
  YTrend InitialValue ZTrend InitialValue;
```

```
array Y_intercept{2}    YIntercept1 - YIntercept2;
```

```
array Z_intercept{2}    ZIntercept1 - ZIntercept2;
```

```
array eta{2}            eta1 - eta2;
```

```
array ksi{2}            ksi1 - ksi2;
```

```
array Ypr{3}    Yp1 - Yp3;
```

```
array Zpr{3}    Zp1 - Zp3;
```

```
array YZpr{3,3}  YZp1 - YZp9;
```

```
array YZcpr{3,3} F1 - F9;
```

```
array S_terms{3,3}  S1 - S9;
```

```
array psi{3,3}      psi1 - psi9;
```

```
array log_psi{3,3}  log_psi1 - log_psi9;
```

```
do i = 1 to 2;
```

\*The term “+ i\*YTrend\*RiskFactorforY” is included when the trend odds holds for Y.

```
  eta[i] = Y_intercept[i] + YBeta*RiskFactorforY + i*YTrend*RiskFactorforY;
```

```
  Ypr[i] = exp(eta[i]) / (1+ exp(eta[i]));
```

```
end;
```

```
do j = 1 to 2;
```

\*The term “+ j\*YTrend\*RiskFactorforY” is included when the trend odds holds for Z.

```
  ksi[j] = Z_intercept[j] + ZBeta*RiskFactorforZ + j*ZTrend*RiskFactorforY;
```

```
  Zpr[j] = exp(ksi[j]) / (1+ exp(ksi[j]));
```

```
end;
```

```
do i = 1 to 3;
```

```
  do j = 1 to 3;
```

```

log_psi[i,j] = GlobalOddsIntercept + YZBeta*RiskFactorforGlobalOdds;
end;
end;
Ypr[3] = 1; Zpr[3] = 1; YZcpr[3,3] = 1; psi[1,1] = exp(log_psi[1,1]);
YZcpr[1,1] = ( 1 + (Yp1+ Zp1)*(psi[1,1]-1) - (sqrt( (1+( Yp1+Zp1)*(psi[1,1]-1))**2 +
4*psi[1,1]*(1-psi[1,1])* Yp1 * Zp1)) ) / (2*(psi[1,1]-1));
YZpr[1,1] = YZcpr[1,1];
if Y = 1 and Z = 1 then z = YZpr[1,1];
do i = 2 to 3;
psi[i,1] = exp(log_psi[i,1]);
YZcpr[i,1] = ( 1 + (Ypr[i]+Zpr[1])*(psi[i,1]-1) - (sqrt( (1+(Ypr[i]+Zpr[1])*(psi[i,1]-1))**2
+ 4*psi[i,1]*(1-psi[i,1])*Ypr[i]*Zpr[1])) ) / (2*(psi[i,1]-1));
YZpr[i,1] = YZcpr[i,1] - YZcpr[i-1,1];
if Y = i and Z = 1 then z = YZpr[i,1];
end;
do j = 2 to 3;
psi[1,j] = exp(log_psi[1,j]);
YZcpr[1,j] = (1+(Ypr[1]+Zpr[j])*(psi[1,j]-1) - (sqrt( (1+(Ypr[1]+Zpr[j])*(psi[1,j]-1))**2
+ 4*psi[1,j]*(1-psi[1,j])*Ypr[1]*Zpr[j]))) / (2*(psi[1,j]-1));
YZpr[1,j] = YZcpr[1,j] - YZcpr[1,j-1];
if Y = 1 and Z = j then z = YZpr[1,j];
end;
do i = 2 to 3;
do j = 2 to 3;
psi[i,j] = exp(log_psi[i,j]);
YZcpr[i,j] = (1+(Ypr[i]+Zpr[j])*(psi[i,j]-1) - (sqrt( (1+(Ypr[i]+Zpr[j])*(psi[i,j]-1))**2
+ 4*psi[i,j]*(1-psi[i,j])*Ypr[i]*Zpr[j]))) / (2*(psi[i,j]-1));
YZpr[i,j] = YZcpr[i,j]-YZcpr[i-1,j]-YZcpr[i,j-1]+ YZcpr[i-1,j-1];
if Y = i and Z = j then z = YZpr[i,j];
end;
end;
end;
if (z > 1e-8) then ll = log(z);
else ll = -1e100;
model ll ~ general(ll);
run;quit;

```

**Appendix B.** Bivariate distribution of differences in probability. Top graph is the  $PDF(Y^*, Z^* | \psi=10) - PDF(Y^*, Z^* | \psi=0)$ , and bottom graph is the  $PDF(Y^*, W^* | \psi=10) - PDF(Y^*, W^* | \psi=0)$ , for  $Y^* \sim \text{Logistic}(15, 2)$ ,  $Z^* \sim \text{Logistic}(10, 2)$  and  $W^* \sim \text{Logistic}(10, 1)$ .

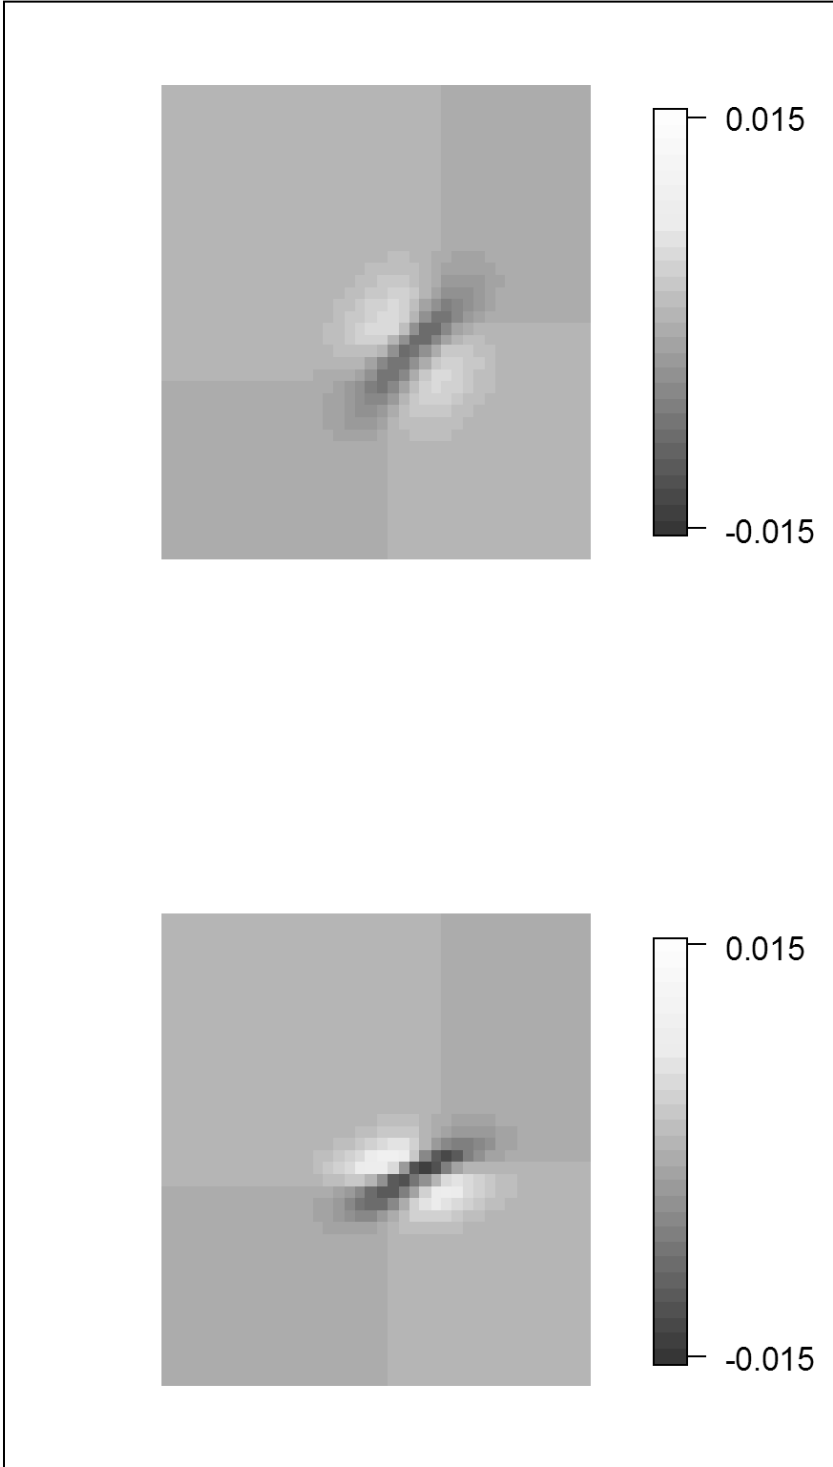

Supplement: NIHMS1514995-supplement-1.pdf [file NIHMS1514995-supplement-1.pdf]
